# Supplementary material for: Biocompatible double network poly(acrylamide-co-acrylic acid)–Al3+/poly(vinyl alcohol)/graphene oxide nanocomposite hydrogels with excellent mechanical properties, self-recovery and self-healing ability
Source: Royal Society of Chemistry journal article supplement (doi:10.1039/d0nj01725f), 2020-01-01
Supplement: d0nj01725f1.pdf [file d0nj01725f1.pdf]

**Biocompatible double network poly(acrylamide-co-acrylic acid)-  
Al<sup>3+</sup>/poly(vinyl alcohol)/graphene oxide nanocomposite  
hydrogels with excellent mechanical properties, self-recovery  
and self-healing ability**

*Zhanxin Jing<sup>a,\*</sup>, Xueying Xian<sup>a</sup>, QiuHong Huang<sup>a</sup>, Qiurong Chen<sup>a</sup>, Pengzhi Hong<sup>a</sup>, Yong Li<sup>a</sup>,*

*Aihua Shi<sup>b,\*</sup>*

*<sup>a</sup>College of Chemistry and Environment, Guangdong Ocean University, Zhanjiang, Guangdong*

*524088, People's Republic of China*

*<sup>b</sup>National Local Joint Engineering Research Center for Precision Surgery & Regenerative*

*Medicine, The First Affiliated Hospital of Xi'an Jiaotong University, Xi'an, Shaanxi 710061,*

*People's Republic of China*

## **Supporting Information**

---

\* Corresponding author.

E-mail address: [jingzhan\\_xin@126.com](mailto:jingzhan_xin@126.com) (Zhanxin Jing).

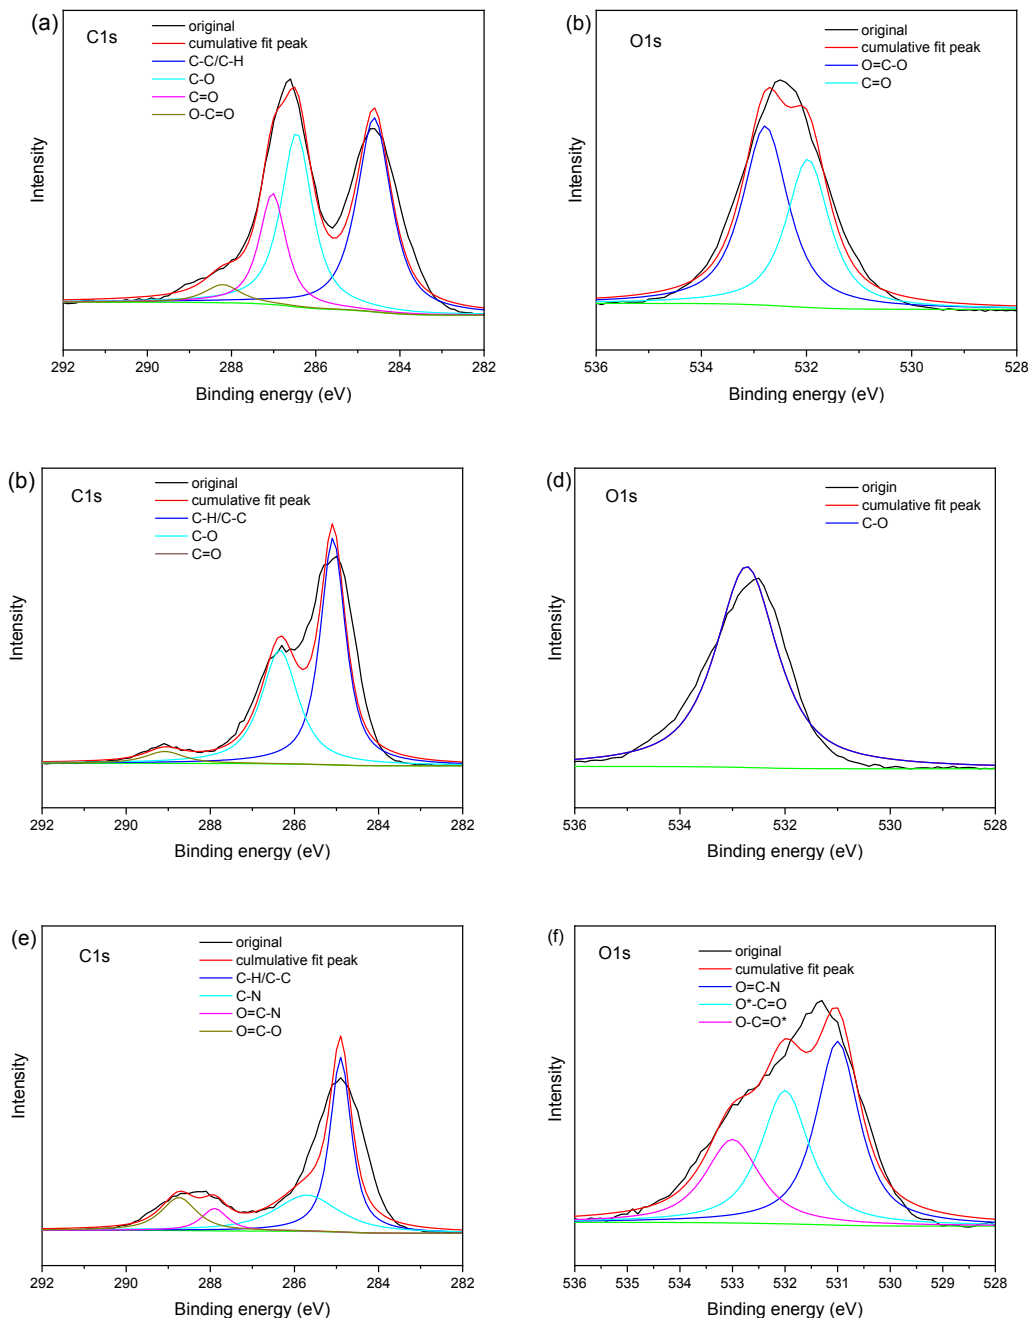

**Fig. S1.** C1s (a, b, e) and O1s (b, d, f) level spectra of GO (a, b), PVA (c, d) and PAA (e, f)

In Figure S1(a), the C1s core-level spectrum of GO could be curve-fitted by the four peaks at the binding energies of 284.6, 286.5, 287.0, 288.2 eV, corresponding to the  $sp^2$ -hybridized graphite-like carbon atoms (C=C),  $sp^3$ -hybridized carbon atoms (C-C), hydroxyl groups (-C-OH), carbonyl groups (C=O) and carboxyl groups (-COOH) groups, respectively<sup>1,2</sup>. As displayed in Figure S1(b), the O1s core-level spectrum of GO could be fit into two peaks, where the peak at

532.0 eV is assigned to C=O, and the another at 532.8 eV is attributed to O=C-O, carbonyl oxygen atoms in carboxylic groups, esters<sup>3</sup>. The C1s and O1s core-level spectra of PVA are shown in Figure S1 (c) and (d), respectively. The C1s core-level spectrum of PVA shows three peaks at 285.0, 286.4 and 289.1 eV, attributed to -CH<sub>2</sub>-, C-O, O-C=O, respectively. The O1s core level spectrum was curve fitted with one peak at 532.7 eV, assigned to C-O<sup>4</sup>. Figure S1 (e) and (f) show the C1s and O1s core-level spectra of PAmAA, respectively. As Figure S1(e), the C1s core-level spectrum of PAmAA shows four peaks at 284.8, 285.7, 287.9 and 288.7 eV, attributed to C-C/C-H, C-N, O=C-N and O=C-O, respectively. The O1s core-level spectrum of PAmAA exhibits three peaks at 531.0, 532.0 and 533.0 eV, assigned to O=C-N, O<sup>\*</sup>-C=O and O-C=O<sup>\*</sup>, respectively<sup>5,6</sup>.

## Reference

1. D. Shao, G. Hou, J. Li, T. Wen, X. Ren and X. Wang, *Chem. Eng. J.*, 2005, **255**, 604-612.
2. P. Wu, Z. Cai, Y. Gao, H. Zhang and C. Cai, *Chem. Commun.*, 2011, **47**, 11327-11329.
3. R. Sitko, E. Turek, B. Zawisza, E. Malicka, E. Talik, J. Heimann, A. Gagor, B. Feist and R. Wrzalik, *Dalton T.*, 2013, **42**, 5682-5689.
4. D. T. Padavan, A. M. Hamilton, L. E. Millon, D. R. Boughner and W. Wan, *Acta Biomater.*, 2011, **7**, 258-267.
5. S. He, F. Zhang, S. Cheng and W. Wang, *ACS Sustain. Chem. Eng.*, 2016, **4**, 3948-3959.
6. T. Liu, C. Jiao, X. Peng, Y.N. Chen, Y. Chen, C. He, R. Liu and H. Wang, *J. Mater. Chem. B*, 2018, **6**, 8105-8114.
